1 **Title: Bioanalyzer chips can be used interchangeably for many analyses of DNA or RNA**

2 **Authors: Jessica Davies<sup>1</sup>, Tom Denyer<sup>1</sup>, James Hadfield<sup>1,2</sup>**

3 **1: Genomics Core Facility, Cancer Research UK Cambridge Institute, Li Ka Shing Centre,**  
4 **University of Cambridge, Robinson Way, Cambridge, CB2 0RE, UK**

5 **2: Correspondence: Dr James Hadfield, Genomics Core Facility, Cancer Research UK**  
6 **Cambridge Institute, Li Ka Shing Centre, University of Cambridge, Robinson Way, Cambridge,**  
7 **CB2 0RE, UK. [James.Hadfield@cruk.cam.ac.uk](mailto:James.Hadfield@cruk.cam.ac.uk).**

8 **Abstract**

9 The Agilent 2100 Bioanalyzer (Agilent Technologies, CA, USA) enables small-scale gel electrophoretic  
10 separation of nucleic acids on a microfluidic chip. Shortage of chips and excess reagents is a common  
11 issue. This report explored the compatibility of two commonly used Bioanalyzer reagents with three  
12 Bioanalyzer chip types. Microfluidic electrophoretic separation of DNA and RNA using DNA High  
13 Sensitivity and RNA 6000 Nano reagents, respectively, was successfully performed on multiple chip  
14 types, following the assay-specific protocol. For RNA quality and next-generation sequencing library  
15 size estimation, the Bioanalyzer chips tested can be used interchangeably. These findings will be  
16 valuable for any laboratory using the Agilent Bioanalyzer in a shared facility.

17 **Methods summary**

18 Four RNA samples (from murine brain) and four DNA samples (RNA-seq libraries made using the  
19 Illumina TruSeq Stranded mRNA kit, Illumina Inc., San Diego, USA) were run in triplicate using RNA  
20 6000 Nano and DNA High Sensitivity (HS) reagents, respectively, on RNA 6000 Nano, DNA HS and  
21 DNA 1000 chips. Quality and concentration of RNA samples, and concentration and size distribution  
22 of DNA samples were tested. We demonstrate that any of the Bioanalyzer chips tested can be used  
23 interchangeably with defined Bioanalyzer reagents for qualitative analysis, and can also be  
24 reasonably quantitative, provided the protocol and software method for the corresponding assay  
25 reagent kit are followed correctly.

26 **Main text**

27 The Agilent 2100 Bioanalyzer performs microfluidic electrophoretic separation on microfabricated  
28 chips (1). In comparison to slab gel electrophoresis, the Bioanalyzer provides many advantages:  
29 separation is quick; minimal sample volume is required (1 µl); user exposure to hazardous materials  
30 is minimal; and the assessment of sample quantity and quality is not dependent on the user's  
31 interpretation.

32 Results of nucleic acid sample separation are displayed on an electropherogram and gel-like image,  
33 generated by the Bioanalyzer 2100 Expert Software (1). These provide a visualisation of sample  
34 quality and quantity; for RNA, integrity is additionally assessed by a software algorithm which  
35 produces an RNA integrity number (RIN) (2, 3). DNA samples, such as PCR products, restriction  
36 digests, and plasmid digests, can be assessed with kits covering a vast range of product lengths.  
37 Moreover, the additional high sensitivity reagents are particularly useful for library assessment prior  
38 to next-generation sequencing.

39 A common problem in the laboratory is that of chip shortage with excess reagents, particularly in  
40 laboratory service environments which experience both high usage and fluctuations in the demand  
41 for different kit types. Therefore, an investigation into whether reagents can be used  
42 interchangeably with different Agilent Bioanalyzer chips would be valuable for many researchers.  
43 Anecdotal reports of using the wrong chip type have been noted previously (4). Others have  
44 demonstrated the ability to re-use chips multiple times without detrimentally affecting results (5, 6).  
45 We explored the compatibility of RNA 6000 Nano and DNA HS Bioanalyzer reagents with three chip  
46 types, following the assay-specific protocol and using the assay-specific software.

47 The RIN and concentration of four RNA samples measured in triplicate (R1, R2, R3, and R4) were  
48 assessed using the RNA 6000 Nano reagents and protocol, on RNA 6000 Nano, DNA HS and DNA  
49 1000 chips. Importantly, the sticker displaying the chip layout was disregarded and the loading  
50 pattern indicated in the assay-specific protocol was used. All chips were run on the Agilent 2100  
51 Bioanalyzer using the Eukaryotic Total RNA Nano assay. Concentration and RIN of each RNA sample  
52 were highly comparable between chips (inter-chip concentration:  $p = 0.96$ ; RIN: ANOVA  $p = 0.13$ )  
53 (see **Table 1 and Fig. 1**). Intra- and inter-chip variability for RNA RIN and concentration were very  
54 similar. RIN and RNA concentration were both well within the normal variability expected of samples  
55 submitted for RNA-seq experiments.

56 The size distribution and concentration of four DNA samples (RNA-seq libraries; D1, D2, D3, and D4)  
57 were assessed using the DNA HS reagents and protocol, on RNA 6000 Nano, DNA HS and DNA 1000  
58 chips; again, the sticker displaying the chip layout was disregarded. All chips were run on the  
59 Bioanalyzer using the DNA HS assay. Manual integration was used to label the prominent peak for  
60 each RNA-seq library, enabling library length and concentration to be calculated. The average size  
61 estimated across all Bioanalyzer chips was 290 bp (SD 6 bp) (**Table 2, and Fig. 1**), with a 40 bp range  
62 across all samples (inter-chip library length: ANOVA  $p = 0.69$ ). DNA concentration showed a 10-20 %  
63 variation in concentration across chips (**Table 2**). Accordingly, care should be taken when  
64 quantifying next-generation sequencing libraries using the Agilent Bioanalyzer; however, the  
65 recommendation is to use quantitative PCR (7).

66 To assess assay reproducibility, which has been previously described by others (8,9), a pool of the  
67 RNA samples described above, or a single DNA sample (RNA-seq library pool, SLX-10140) were  
68 loaded as technical replicates in each well of duplicate chips, for all three chip types tested. Library  
69 length and RIN were consistent between all chips (Fig. 2). RNA and DNA concentration data were  
70 significantly different between chip types, although it was apparent that this was due to inter-chip  
71 variability and not due to chip type (Fig. 2 and Supplementary data).

72 We determined the accuracy of our Bioanalyzer concentration measurements by comparison to  
73 NanoDrop UV spectrophotometry (Nanodrop, DE, USA), Qubit (Thermo Fisher Scientific, MA, USA)  
74 and Kapa qPCR (KAPA BioSystems, South Africa) measurements (Qubit and qPCR are the  
75 recommended quantification methods for RNA and RNA-seq libraries, respectively). The Bioanalyzer  
76 concentration measurement of the RNA pool was less precise (211 ng/ $\mu$ l, SD 102.89 ng/ $\mu$ l) than  
77 Qubit (146 ng/ $\mu$ l, SD 6.24 ng/ $\mu$ l). The Bioanalyzer underestimated the concentration of our RNA-seq  
78 library (1.25 ng/ $\mu$ l) when compared to qPCR (11.17 ng/ $\mu$ l) (Supplementary data). Our data support  
79 the finding that Bioanalyzer quantification is more variable than other methods (9).

81 Our data confirm that, provided the assay-specific protocol is followed, the Bioanalyzer chip type  
82 used is irrelevant for RIN and DNA size estimation, i.e. qualitative analysis of RNA and RNA-seq  
83 libraries. It is important that the chip sticker is not used as a guide. Qubit and qPCR are  
84 recommended for RNA and RNA-seq library concentration measurements; the variability in RNA and  
85 DNA concentration measurements identified between Bioanalyzer runs supports this. These findings  
86 will be applicable to an extensive number of research environments in which the Agilent 2100  
87 Bioanalyzer is used for the assessment of nucleic acid samples; in particular, those facilities which  
88 employ more than one type of kit and are high consumers of Bioanalyzer reagents.

89

90 **Acknowledgements:** We thank all members of the Genomics Core team past and present for useful  
91 discussions; Sarah Vowler for help with statistical tests; and Cancer Research UK and the University  
92 of Cambridge for funding the Genomics Core facilities through the Cambridge Institute grant.

93 **Figures and tables**

94 **Figure 1 legend:** Inter- and intra-chip consistency in the measurement of key sample parameters. A.  
95 Overlaid electropherogram traces of all RNA and DNA Bioanalyzer runs. Four RNA or DNA samples  
96 were run in triplicate on an RNA 6000 Nano, DNA High Sensitivity (HS) and DNA 1000 chip, according  
97 to the RNA 6000 Nano or DNA HS kit protocol, respectively. Note that the lower fluorescence for the  
98 DNA 1000 chip did not affect calculations of sample concentration or length. B. RNA integrity  
99 number (RIN) of the four RNA samples and library size of the four RNA-seq libraries were determined  
100 on each chip. UM = Upper marker; LM = Lower marker peak.

101 **Figure 2 legend:** Reproducibility of chip sample metrics. A technical replicate of RNA or DNA was  
102 loaded onto duplicates of each chip type, and the RNA 6000 Nano or DNA HS kit protocols,  
103 respectively, were followed. Tabulated data and results of statistical tests are given in the  
104 Supplementary material.

105 **Table 1 legend:** RNA data. Four RNA samples were run according to the RNA 6000 Nano protocol, on  
106 each chip. RINs (upper) and sample concentration data (lower) (ng/ $\mu$ l) were determined. Sample R4  
107 was excluded from the DNA HS chip, as the final three wells were used to validate ladder consistency  
108 within a chip. M = mean.

109 **Table 2 legend:** DNA data. Four DNA samples (RNA-seq libraries) were run in triplicate according to  
110 the DNA High Sensitivity (HS) protocol, on a DNA 1000, DNA HS and RNA 6000 Nano chip. Manual  
111 integration was used to delete artefacts and select the desired peak; library length (upper) and  
112 concentration data (lower) (ng/ $\mu$ l) were determined by the software. The DNA HS protocol uses 11  
113 sample wells, therefore D4 was loaded in duplicate. M = median library length or mean  
114 concentration.

115

116 **References**

- 117 1. **Mueller, O., Hahnenberger, K., Dittmann, M., Yee, H., Dubrow, R., Nagle, R., and Ilsley,**  
118 **D.** 2000. A microfluidic system for high-speed reproducible DNA sizing and quantitation.  
119 *Electrophoresis* 21:128-134.
- 120 2. **Mueller, O., Lightfoot, S. and Schroeder, A.** 2004. RNA Integrity Number (RIN) –  
121 Standardization of RNA Quality Control. Agilent Application Note. Publication Number  
122 5989-1165EN
- 123 3. **Schroeder, A., Mueller, O., Stocker, S., Salowsky, R., Leiber, M., Gassmann, M.,**  
124 **Lightfoot, S., Menzel, W., Granzow, M., and Ragg, T.** 2006. The RIN: an RNA integrity  
125 number for assigning integrity values to RNA measurements. *BMC Molecular Biology* 7:3  
126 4. <http://seqanswers.com/forums/showthread.php?t=41878>
- 127 5. **Chim, W. and Li, P. C. H.** 2012. Repeated capillary electrophoresis separations  
128 conducted on a commercial DNA chip. *Analytical Methods* 4:864-868
- 129 6. **Nguyen, T., Kwak, S. and Karpowicz, S. J.** 2014. Re-use of commercial microfluidics chips  
130 for DNA, RNA, and protein electrophoresis. *BioTechniques* 57:267-271
- 131 7. [https://support.illumina.com/downloads/sequencing\\_library\\_qpcr\\_quantification\\_guide](https://support.illumina.com/downloads/sequencing_library_qpcr_quantification_guide_11322363.html)  
132 [\\_11322363.html](https://support.illumina.com/downloads/sequencing_library_qpcr_quantification_guide_11322363.html)
- 133 8. **Lu, C-Y., Tso, D-J., Yang, T., Jong, Y-J., and Wei, Y-H.** (2002) Detection of DNA mutations  
134 associated with mitochondrial diseases by Agilent 2100 bioanalyzer. *Clinica Chimica*  
135 *Acta.* 318: 97-105
- 136 9. **Lightfoot, S.** 2002. Quantitation comparison of total RNA using the Agilent 2100  
137 bioanalyzer, ribogreen analysis and UV spectrometry. Agilent Application Note.  
138 Publication Number 5988-7650EN

**A**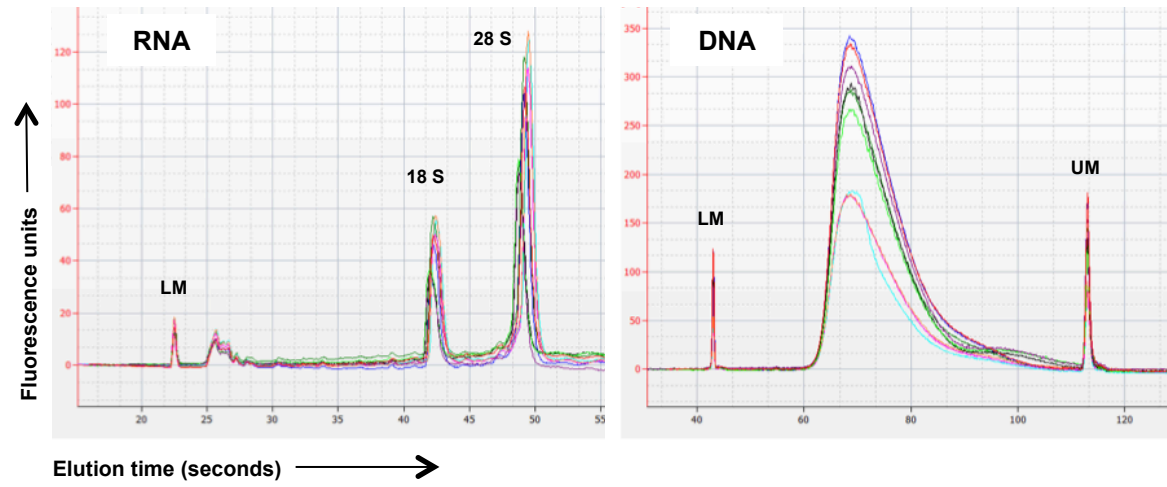**B**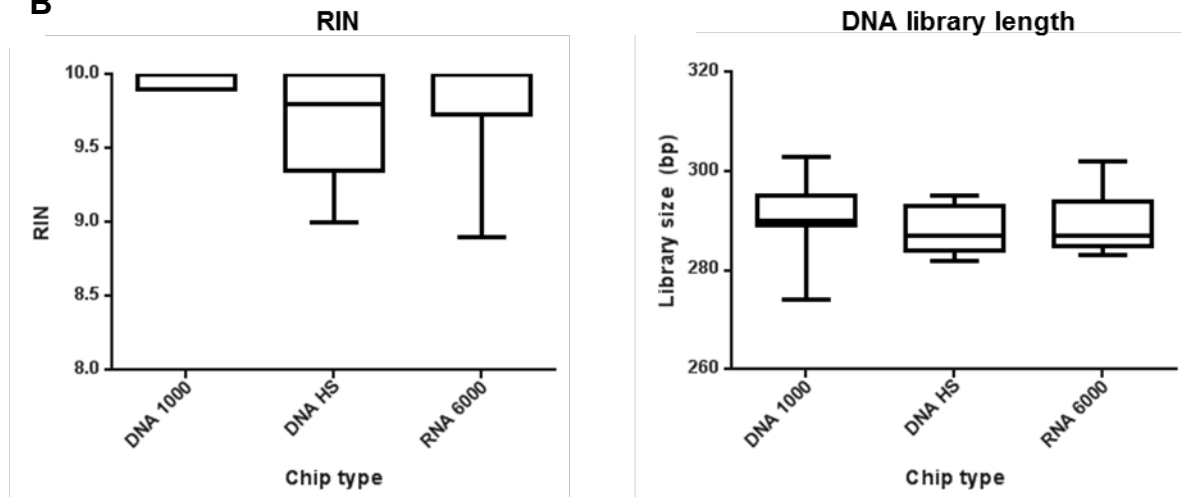

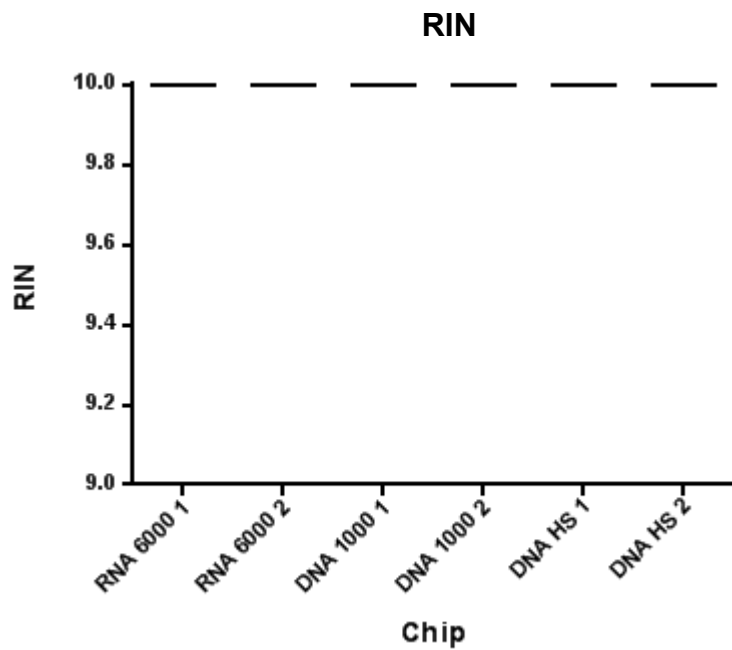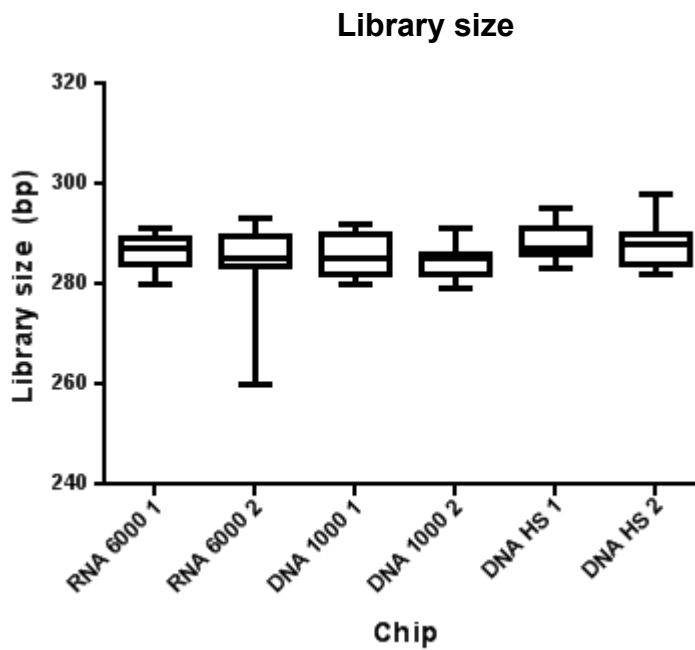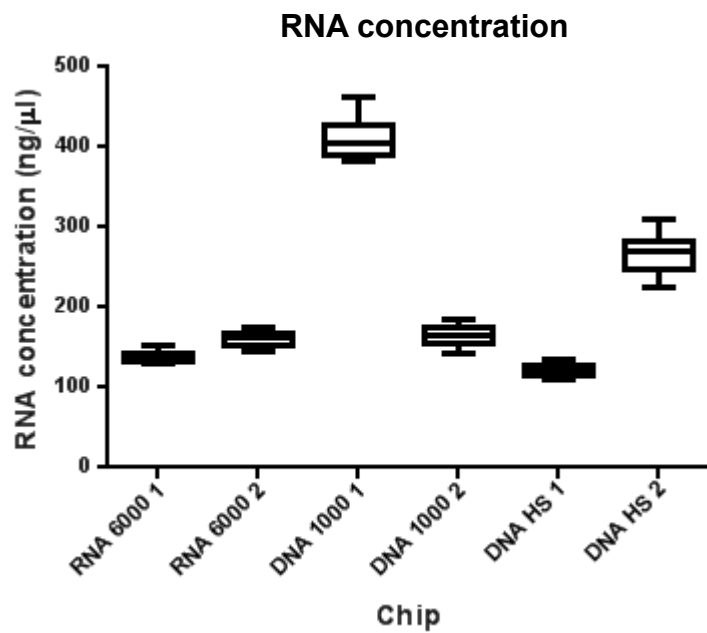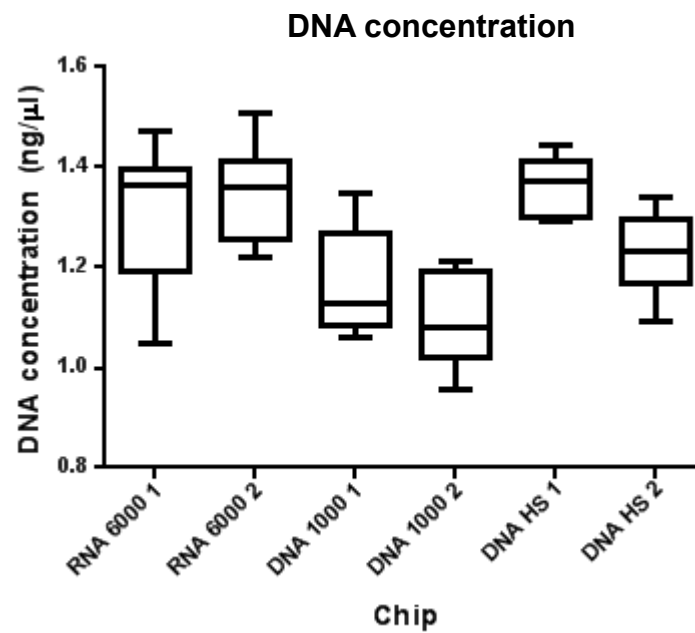

Table 1: RNA data

| RNA Sample | DNA 1000 |       |       |              | DNA HS |       |       |              | RNA Nano |       |       |              |
|------------|----------|-------|-------|--------------|--------|-------|-------|--------------|----------|-------|-------|--------------|
|            | 1        | 2     | 3     | M            | 1      | 2     | 3     | M            | 1        | 2     | 3     | M            |
| <b>R1</b>  | 9.9      | 9.9   | 10.0  | <b>9.9</b>   | 9.2    | 10.0  | 9.7   | <b>9.6</b>   | 9.9      | 8.9   | 9.7   | <b>9.5</b>   |
| <b>R2</b>  | 9.9      | 9.9   | 9.9   | <b>9.9</b>   | 10.0   | 9.0   | 10.0  | <b>9.7</b>   | 9.8      | 10.0  | 9.2   | <b>9.5</b>   |
| <b>R3</b>  | 10.0     | 10.0  | 10.0  | <b>10.0</b>  | 9.5    | 9.8   | 10.0  | <b>9.8</b>   | 10.0     | 10.0  | 10.0  | <b>10.0</b>  |
| <b>R4</b>  | 10.0     | 10.0  | 10.0  | <b>10.0</b>  | n/a    | n/a   | n/a   | <b>n/a</b>   | 10.0     | 10.0  | 10.0  | <b>10.0</b>  |
| <b>R1</b>  | 147.0    | 147.0 | 138.0 | <b>144.0</b> | 151.0  | 131.0 | 129.0 | <b>137.0</b> | 151.0    | 161.0 | 122.0 | <b>144.7</b> |
| <b>R2</b>  | 213.0    | 189.0 | 216.0 | <b>206.0</b> | 223.0  | 270.0 | 206.0 | <b>233.0</b> | 193.0    | 157.0 | 256.0 | <b>202.0</b> |
| <b>R3</b>  | 323.0    | 318.0 | 337.0 | <b>326.0</b> | 343.0  | 280.0 | 299.0 | <b>307.3</b> | 254.0    | 272.0 | 355.0 | <b>293.7</b> |
| <b>R4</b>  | 222.0    | 231.0 | 265.0 | <b>239.3</b> | n/a    | n/a   | n/a   | <b>n/a</b>   | 227.0    | 238.0 | 261.0 | <b>242.0</b> |

Four RNA samples were run according to the RNA 6000 Nano protocol, on a DNA 1000, DNA HS and RNA 6000 Nano chip. RINs (upper) and sample concentration data (lower) (ng/μl) were determined. Sample R4 was excluded from the DNA HS chip, as the final three wells were used to validate ladder consistency within a chip. M = mean.



Table 2: DNA data

| DNA Sample | DNA 1000 |     |     |            | DNA HS |     |     |            | RNA Nano |     |     |            |
|------------|----------|-----|-----|------------|--------|-----|-----|------------|----------|-----|-----|------------|
|            | 1        | 2   | 3   | Md         | 1      | 2   | 3   | Md         | 1        | 2   | 3   | Md         |
| <b>D1</b>  | 274      | 284 | 291 | <b>284</b> | 287    | 285 | 282 | <b>285</b> | 286      | 285 | 283 | <b>285</b> |
| <b>D2</b>  | 303      | 294 | 297 | <b>297</b> | 294    | 292 | 295 | <b>294</b> | 295      | 294 | 290 | <b>294</b> |
| <b>D3</b>  | 290      | 290 | 290 | <b>290</b> | 282    | 285 | 284 | <b>284</b> | 286      | 285 | 287 | <b>286</b> |
| <b>D4</b>  | 295      | 289 | n/a | <b>292</b> | 293    | 293 | n/a | <b>293</b> | 302      | 293 | n/a | <b>298</b> |
| <b>D1</b>  | 2.4      | 2.1 | 2.1 | <b>2.2</b> | 1.9    | 2.0 | 2.0 | <b>2.0</b> | 2.7      | 2.6 | 2.5 | <b>2.6</b> |
| <b>D2</b>  | 5.3      | 6.3 | 6.0 | <b>5.9</b> | 5.3    | 5.7 | 5.3 | <b>5.4</b> | 5.7      | 6.6 | 6.1 | <b>6.1</b> |
| <b>D3</b>  | 2.0      | 1.9 | 1.9 | <b>1.9</b> | 1.8    | 1.7 | 1.8 | <b>1.8</b> | 2.3      | 2.5 | 2.3 | <b>2.4</b> |
| <b>D4</b>  | 4.6      | 6.2 | n/a | <b>5.4</b> | 4.7    | 5.3 | n/a | <b>5.0</b> | 4.5      | 6.2 | n/a | <b>5.3</b> |

Four DNA samples (RNA-seq libraries) were run in triplicate according to the DNA High Sensitivity (HS) protocol, on each chip. Manual integration was used to delete artefacts and select the desired peak; library length (bp) (upper) and concentration data (lower) (ng/ $\mu$ l) were determined by the software. The DNA HS protocol uses 11 sample wells, therefore D4 was loaded in duplicate. Md = median.
